# Supplementary material for: Microencapsulation of Probiotics by Oil-in-Water Emulsification Technique Improves Cell Viability under Different Storage Conditions
Source: MDPI journal article supplement (doi:10.3390/foods12020252), 2023-01-05
Supplement: s1 [file s1]

## Supplementary material S.2

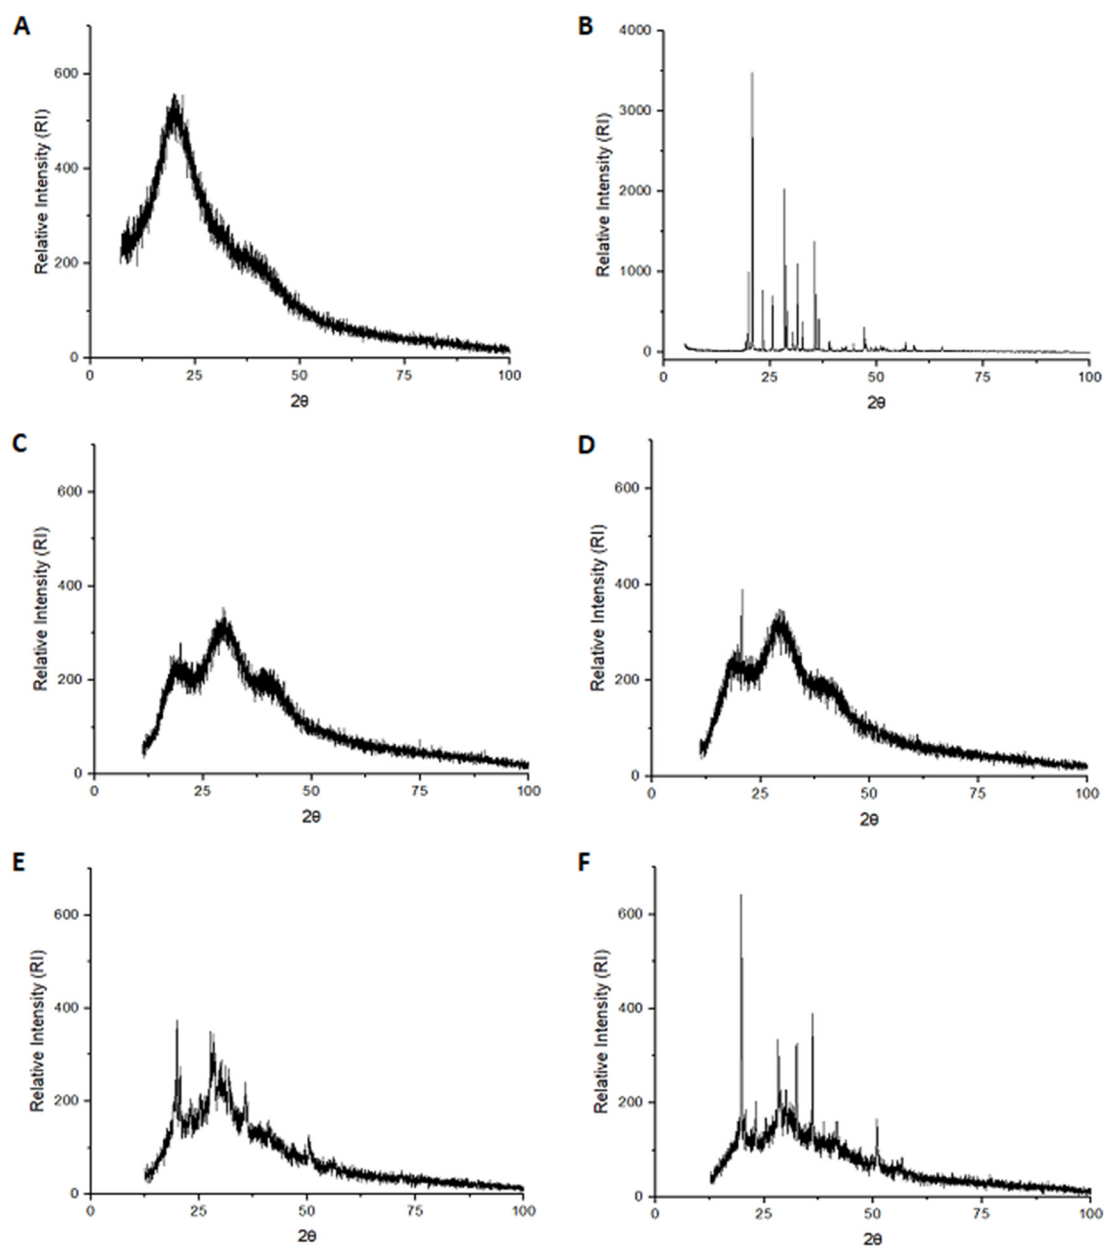

**Figure S2.** X-ray diffractograms of the powder particles of the encapsulates obtained by O/W emulsification. (A) porcine gelatin; (B) sodium alginate; (C) LAEG - *L. acidophilus* in gelatin; (D) LPEG - *L. plantarum* in gelatin; (E) LAEA - *L. acidophilus* in alginate; (F) LPEA - *L. plantarum* in alginate.
