# Supplementary material for: Microencapsulation of Probiotics by Oil-in-Water Emulsification Technique Improves Cell Viability under Different Storage Conditions
Source: MDPI journal article supplement (doi:10.3390/foods12020252), 2023-01-05
Supplement: s1 [file s1]

## Supplementary material S.1

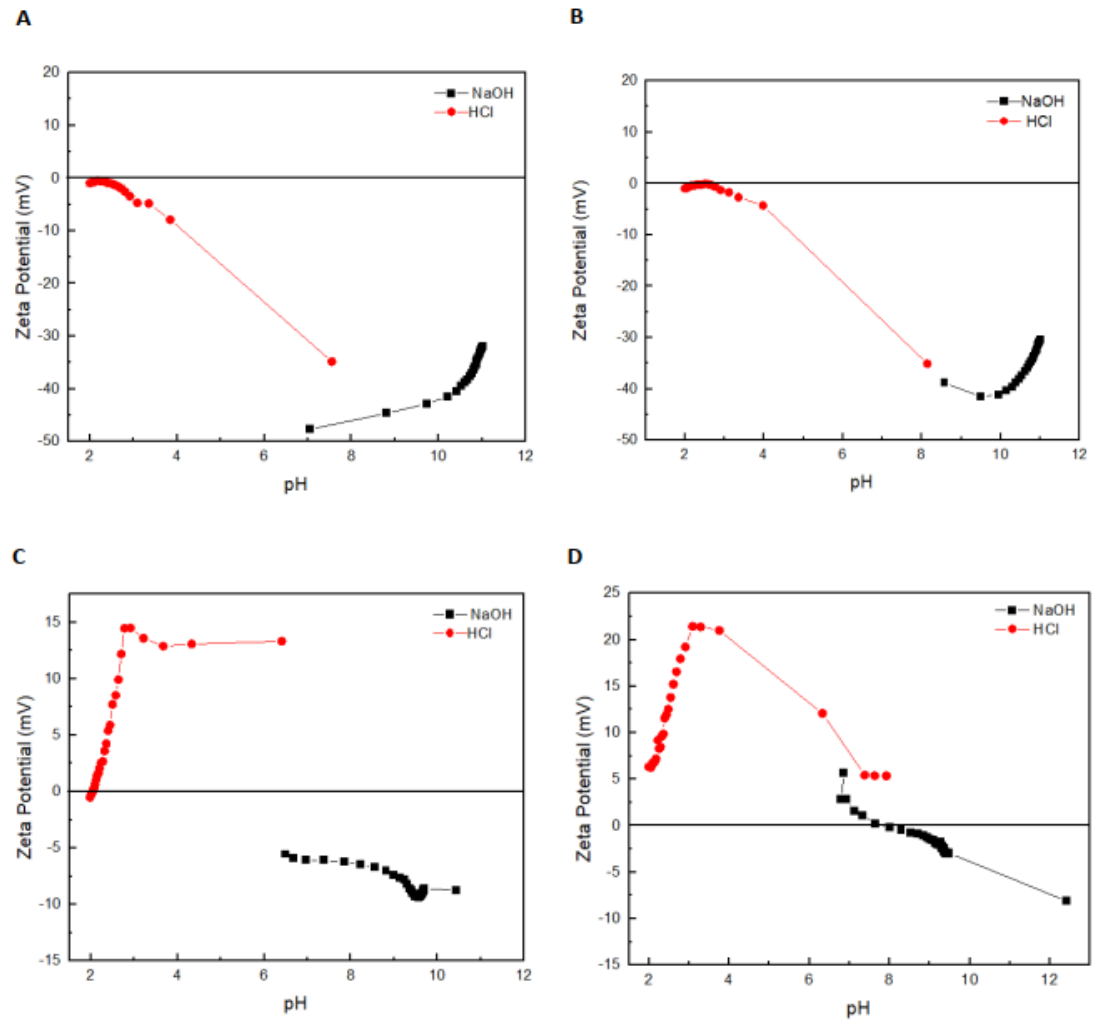

**Figure S1.** Zeta Potential of encapsulates obtained by O/W emulsification. (A) LAEA: *L. acidophilus* in alginate; (B) LPEA: *L. plantarum* in alginate; (C) LAEG: *L. acidophilus* in gelatin; (D) LPEG - *L. plantarum* in gelatin.
